# Supplementary material for: Late plasma exosome microRNA-21-5p depicts magnitude of reverse ventricular remodeling after early surgical repair of primary mitral valve regurgitation
Source: PubMed Central journal article supplement (PMC9373041; doi:10.3389/fcvm.2022.943068), 2022-07-29
Supplement: Data_Sheet_1.pdf [file Data_Sheet_1.pdf]

**Supplementary Table 1: Comparison of preoperative and postoperative CMRI results in primary MR patents undergoing MVR surgery.** CMRI was performed on N=19 patients undergoing MVR surgery before (T0) and 6 months after (T1) procedure. Data are presented as mean  $\pm$  SD. Statistical significance of the differences between T0 and T1 was evaluated by paired Student's T test or Wilcoxon test depending on data distribution.

|                                               | <b>T0</b>             | <b>T1</b>            |   | <b>p-value</b>               |
|-----------------------------------------------|-----------------------|----------------------|---|------------------------------|
| <b>LVEDVi [mL/m<sup>2</sup>]</b>              | 113.67 $\pm$ 25.37    | 73.52 $\pm$ 12.83    | ▼ | <b>1.90·10<sup>-6</sup></b>  |
| <b>LVESVi [mL/m<sup>2</sup>]</b>              | 42.50 $\pm$ 11.77     | 35.51 $\pm$ 9.56     | ▼ | <b>0.0055</b>                |
| <b>RVEDVi [mL/m<sup>2</sup>]</b>              | 84.78 $\pm$ 15.57     | 66.92 $\pm$ 10.92    | ▼ | <b>1.30·10<sup>-5</sup></b>  |
| <b>RVESVi [mL/m<sup>2</sup>]</b>              | 34.44 $\pm$ 9.00      | 30.21 $\pm$ 7.50     | ▼ | <b>0.0352</b>                |
| <b>LV Mass index [g/m<sup>2</sup>]</b>        | 77.44 $\pm$ 13.36     | 70.55 $\pm$ 10.02    | ▼ | <b>0.0035</b>                |
| <b>LVSV [mL]</b>                              | 142.33 $\pm$ 35.93    | 74.84 $\pm$ 16.74    | ▼ | <b>7.14·10<sup>-7</sup></b>  |
| <b>LVSVi [mL/m<sup>2</sup>]</b>               | 72.36 $\pm$ 16.98     | 38.02 $\pm$ 7.64     | ▼ | <b>7.26·10<sup>-7</sup></b>  |
| <b>RVSV [mL]</b>                              | 100.67 $\pm$ 20.93    | 72.32 $\pm$ 16.80    | ▼ | <b>3.10·10<sup>-5</sup></b>  |
| <b>RVSVi [mL/m<sup>2</sup>]</b>               | 51.15 $\pm$ 9.72      | 36.71 $\pm$ 7.57     | ▼ | <b>3.70·10<sup>-5</sup></b>  |
| <b>LVEF [%]</b>                               | 62.60 $\pm$ 5.87      | 52.01 $\pm$ 7.82     | ▼ | <b>2.80 ·10<sup>-7</sup></b> |
| <b>RVEF [%]</b>                               | 59.64 $\pm$ 6.56      | 54.89 $\pm$ 7.76     | ▼ | <b>0.0215</b>                |
| <b>Heart rate [BPM]</b>                       | 61.00 $\pm$ 7.92      | 70.47 $\pm$ 12.89    | ▲ | <b>0.0100</b>                |
| <b>Cardiac index [mL/min ·m<sup>2</sup>]</b>  | 4180.36 $\pm$ 1114.27 | 2638.26 $\pm$ 555.51 | ▼ | <b>7.40·10<sup>-5</sup></b>  |
| <b>LA Area index [cm]</b>                     | 19.37 $\pm$ 7.89      | 9.95 $\pm$ 2.17      | ▼ | <b>7.60·10<sup>-6</sup></b>  |
| <b>RA Area [cm]</b>                           | 14.32 $\pm$ 5.71      | 10.58 $\pm$ 2.32     | ▼ | <b>0.0010</b>                |
| <b>LA-max volume index [mL/m<sup>2</sup>]</b> | 77.53 $\pm$ 27.15     | 37.77 $\pm$ 7.47     | ▼ | <b>1.30·10<sup>-5</sup></b>  |
| <b>LAEF [%]</b>                               | 53.44 $\pm$ 9.48      | 37.37 $\pm$ 10.83    | ▼ | <b>0.00067</b>               |

**Supplementary Table 2: Analysis of CMRI parameters in MR patients showing different rates of reverse remodeling after MVR surgery.** CMRI data were collected for N=19 patients undergoing MVR surgery before (T0) and 6 months after (T1) the procedure. For each CMRI parameter measured, percentage change between T0 and T1 was computed as  $\% \Delta = (T1 - T0) / T0 * 100$  for each patient. T0, T1 and percentage change CMRI data ( $\% \Delta$ ) were compared between LoR-REM and HiR-REM patients. Data are presented as mean  $\pm$  SD. Statistical significance of the differences was evaluated by independent samples Student's T test (with or without Welch's correction) or Mann Whitney test depending on data distribution.

|                     |                                     | LoR-REV                              | HiR-REV                              |    | p-value                                        |
|---------------------|-------------------------------------|--------------------------------------|--------------------------------------|----|------------------------------------------------|
| LVEDVi              | T0 [mL/m <sup>2</sup> ]             | 100.05 $\pm$ 13.34                   | 125.93 $\pm$ 27.87                   | ▲  | 0.0209                                         |
|                     | T1 [mL/m <sup>2</sup> ]             | 79.11 $\pm$ 8.67                     | 68.50 $\pm$ 14.27                    | Ns | 0.1774                                         |
|                     | $\Delta$ (T1-T0)/ T0 [%]            | <b>-20.23 <math>\pm</math> 9.86</b>  | <b>-44.61 <math>\pm</math> 9.94</b>  | ▼  | <b>5.20 <math>\cdot</math> 10<sup>-5</sup></b> |
| LVESVi              | T0 [mL/m <sup>2</sup> ]             | 39.82 $\pm$ 11.69                    | 44.92 $\pm$ 11.92                    | Ns | 0.3582                                         |
|                     | T1 [mL/m <sup>2</sup> ]             | 39.67 $\pm$ 9.45                     | 31.90 $\pm$ 8.46                     | Ns | 0.0758                                         |
|                     | $\Delta$ (T1-T0)/ T0 [%]            | <b>2.40 <math>\pm</math> 21.87</b>   | <b>-28.40 <math>\pm</math> 10.97</b> | ▼  | <b>0.0010</b>                                  |
| RVEDVi              | T0 [mL/m <sup>2</sup> ]             | 83.97 $\pm$ 13.40                    | 85.52 $\pm$ 18.01                    | Ns | 0.8340                                         |
|                     | T1 [mL/m <sup>2</sup> ]             | 70.00 $\pm$ 8.66                     | 64.10 $\pm$ 12.35                    | Ns | 0.2496                                         |
|                     | $\Delta$ (T1-T0)/ T0 [%]            | <b>-15.43 <math>\pm</math> 12.70</b> | <b>-23.82 <math>\pm</math> 12.44</b> | Ns | <b>0.1642</b>                                  |
| RVESVi              | T0 [mL/m <sup>2</sup> ]             | 34.67 $\pm$ 9.29                     | 34.24 $\pm$ 9.24                     | Ns | 0.9213                                         |
|                     | T1 [mL/m <sup>2</sup> ]             | 31.67 $\pm$ 8.03                     | 28.90 $\pm$ 7.16                     | Ns | 0.3234                                         |
|                     | $\Delta$ (T1-T0)/ T0 [%]            | <b>-5.419 <math>\pm</math> 25.49</b> | <b>-12.10 <math>\pm</math> 22.84</b> | Ns | <b>0.5546</b>                                  |
| LV Mass index       | T0 [g/m <sup>2</sup> ]              | 74.56 $\pm$ 7.57                     | 80.04 $\pm$ 17.04                    | Ns | 0.3727                                         |
|                     | T1 [g/m <sup>2</sup> ]              | 72.94 $\pm$ 6.99                     | 68.40 $\pm$ 12.09                    | Ns | 0.3373                                         |
|                     | $\Delta$ (T1-T0)/ T0 [%]            | <b>-1.928 <math>\pm</math> 6.47</b>  | <b>-13.43 <math>\pm</math> 9.511</b> | ▼  | <b>0.0073</b>                                  |
| LVSVi               | T0 [mL/m <sup>2</sup> ]             | 60.26 $\pm$ 6.32                     | 84.46 $\pm$ 15.60                    | ▲  | 0.0013                                         |
|                     | T1 [mL/m <sup>2</sup> ]             | 39.56 $\pm$ 7.21                     | 36.60 $\pm$ 8.11                     | Ns | 0.3030                                         |
|                     | $\Delta$ (T1-T0)/ T0 [%]            | <b>-34.53 <math>\pm</math> 9.70</b>  | <b>-52.95 <math>\pm</math> 12.70</b> | ▼  | <b>0.0032</b>                                  |
| RVSVi               | T0 [mL/m <sup>2</sup> ]             | 49.33 $\pm$ 7.11                     | 52.98 $\pm$ 11.94                    | Ns | 0.4423                                         |
|                     | T1 [mL/m <sup>2</sup> ]             | 38.33 $\pm$ 5.70                     | 35.30 $\pm$ 8.98                     | Ns | 0.3981                                         |
|                     | $\Delta$ (T1-T0)/ T0 [%]            | <b>-21.24 <math>\pm</math> 14.72</b> | <b>-28.37 <math>\pm</math> 14.31</b> | Ns | <b>0.3133</b>                                  |
| LVEF                | T0 [%]                              | 60.73 $\pm$ 7.21                     | 64.28 $\pm$ 4.01                     | Ns | 0.2114                                         |
|                     | T1 [%]                              | 50.33 $\pm$ 9.14                     | 53.50 $\pm$ 6.29                     | Ns | 0.3870                                         |
|                     | $\Delta$ (T1-T0)/ T0 [%]            | <b>-17.64 <math>\pm</math> 9.94</b>  | <b>-16.50 <math>\pm</math> 9.64</b>  | Ns | <b>0.8030</b>                                  |
| RVEF                | T0 [%]                              | 59.12 $\pm$ 6.37                     | 60.10 $\pm$ 7.02                     | Ns | 0.7793                                         |
|                     | T1 [%]                              | 54.89 $\pm$ 8.42                     | 54.70 $\pm$ 7.39                     | Ns | 0.9591                                         |
|                     | $\Delta$ (T1-T0)/ T0 [%]            | <b>-6.420 <math>\pm</math> 13.19</b> | <b>-8.296 <math>\pm</math> 12.63</b> | Ns | <b>0.7554</b>                                  |
| Heart rate          | T0 [BPM]                            | 62.67 $\pm$ 9.26                     | 59.50 $\pm$ 6.64                     | Ns | 0.3998                                         |
|                     | T1 [BPM]                            | 67.11 $\pm$ 14.22                    | 73.50 $\pm$ 11.46                    | Ns | 0.2937                                         |
|                     | $\Delta$ (T1-T0)/ T0 [%]            | <b>8.353 <math>\pm</math> 23.14</b>  | <b>24.71 <math>\pm</math> 22.66</b>  | Ns | <b>0.1382</b>                                  |
| Cardiac index       | T0 [mL/min $\cdot$ m <sup>2</sup> ] | 3,498.15 $\pm$ 703.51                | 4,794.35 $\pm$ 1,076.56              | ▲  | 0.0070                                         |
|                     | T1 [mL/min $\cdot$ m <sup>2</sup> ] | 2582 $\pm$ 397.3                     | 2689 $\pm$ 686.2                     | Ns | 0.6874                                         |
|                     | $\Delta$ (T1-T0)/ T0 [%]            | <b>-20.93 <math>\pm</math> 33.02</b> | <b>-41.55 <math>\pm</math> 17.17</b> | Ns | <b>0.1128</b>                                  |
| LA Area             | T0 [cm]                             | 18.89 $\pm$ 7.20                     | 19.80 $\pm$ 8.83                     | Ns | 0.9483                                         |
|                     | T1 [cm]                             | 10.56 $\pm$ 2.55                     | 9.40 $\pm$ 1.71                      | Ns | 0.3352                                         |
|                     | $\Delta$ (T1-T0)/ T0 [%]            | <b>-38.80 <math>\pm</math> 21.70</b> | <b>-47.26 <math>\pm</math> 14.97</b> | Ns | <b>0.3325</b>                                  |
| RA Area             | T0 [cm]                             | 17.11 $\pm$ 7.17                     | 11.80 $\pm$ 2.15                     | Ns | 0.0602                                         |
|                     | T1 [cm]                             | 11.33 $\pm$ 2.12                     | 9.90 $\pm$ 2.38                      | Ns | 0.1855                                         |
|                     | $\Delta$ (T1-T0)/ T0 [%]            | <b>-25.65 <math>\pm</math> 23.03</b> | <b>-15.33 <math>\pm</math> 17.95</b> | Ns | <b>0.2885</b>                                  |
| LA-max volume index | T0 [mL/m <sup>2</sup> ]             | 62.67 $\pm$ 12.33                    | 89.09 $\pm$ 30.41                    | ▲  | 0.0371                                         |
|                     | T1 [mL/m <sup>2</sup> ]             | 38.01 $\pm$ 5.03                     | 37.55 $\pm$ 9.44                     | Ns | 0.8981                                         |
|                     | $\Delta$ (T1-T0)/ T0 [%]            | <b>-34.97 <math>\pm</math> 15.45</b> | <b>-53.12 <math>\pm</math> 11.58</b> | ▼  | <b>0.0175</b>                                  |
| LAEF                | T0 [%]                              | 52.29 $\pm$ 6.07                     | 54.33 $\pm$ 11.78                    | Ns | 0.8980                                         |
|                     | T1 [%]                              | 37.44 $\pm$ 10.47                    | 37.30 $\pm$ 11.71                    | Ns | 0.9778                                         |
|                     | $\Delta$ (T1-T0)/ T0 [%]            | <b>-27.03 <math>\pm</math> 20.15</b> | <b>-28.07 <math>\pm</math> 24.50</b> | Ns | <b>0.9291</b>                                  |

**Supplementary Table 3: Analysis of pEXO and exosomal miRNA in MR patients showing different rates of reverse remodeling after MVR surgery.** pEXO were isolated from MR patients' (N=19) plasma collected before (T0) and 6 months after surgery (T1); N=8 healthy controls were also employed. pEXO were quantified by NTA as described in the methods. Exosomal miRNA-1, miRNA-21 and miRNA-133a were amplified and measured by qRT-PCR as described in the methods. Presurgical (T0) and postsurgical (T1) levels, and percentage perioperative change [(T1-T0)/T0 \*100] were compared between LoR-REM and HiR-REM patients. Data are presented as median with interquartile range. Statistical significance of the differences between patients' groups was evaluated by independent samples Student's T test (with or without Welch's correction) or Mann Whitney test depending on data distribution. Statistical differences between patients and controls was evaluated by one-way ANOVA (with or without Brown-Forsythe modification for heteroscedastic groups) or Kruskal-Wallis test, depending on sample distribution; p' = p-value LOW-Rev-Rem vs Controls; p'' = p-value HIGH-Rev-rem vs Controls.

|          | LoR-REV                                                             | HiR-REV                                                                | p-value       | Controls                                                               | p'      | p''           |
|----------|---------------------------------------------------------------------|------------------------------------------------------------------------|---------------|------------------------------------------------------------------------|---------|---------------|
| pEXO     | T0 [particles/mL]<br>(7.99·10 <sup>8</sup> - 1.99·10 <sup>9</sup> ) | 1.36·10 <sup>9</sup><br>(6.92·10 <sup>8</sup> - 2.89·10 <sup>9</sup> ) | 0.6607        | 1.08·10 <sup>9</sup><br>(8.78·10 <sup>8</sup> - 1.39·10 <sup>9</sup> ) | 0.8522  | 0.5013        |
|          | T1 [particles/mL]<br>(7.52·10 <sup>8</sup> - 1.57·10 <sup>9</sup> ) | 1.31·10 <sup>9</sup><br>(1.43·10 <sup>8</sup> - 2.49·10 <sup>9</sup> ) | <b>0.0625</b> | 1.08·10 <sup>9</sup><br>(8.78·10 <sup>8</sup> - 1.39·10 <sup>9</sup> ) | >0.9999 | <b>0.0159</b> |
|          | Δ(T1-T0)/ T0 [%]<br>(-56.76 - 137.24)                               | -4.62<br>(-12.46 - 206.38)                                             | 0.4470        |                                                                        |         |               |
| miR-1    | T0 [2 <sup>-ΔACT</sup> ]<br>(0.339 - 1.838)                         | 1.137<br>(1.058 - 2.732)                                               | 0.2428        | 0.771<br>(0.312 - 2.431)                                               | >0.9999 | 0.2685        |
|          | T1 [2 <sup>-ΔACT</sup> ]<br>(0.0034 - 1.105)                        | 0.313<br>(0.594 - 2.386)                                               | <b>0.0179</b> | 0.771<br>(0.312 - 2.431)                                               | 0.1795  | 0.8747        |
|          | Δ(T1-T0)/ T0 [%]<br>(-99.17 - 13.52)                                | -75.52<br>(-66.94 - 100.73)                                            | 0.1487        |                                                                        |         |               |
| miR-21   | T0 [2 <sup>-ΔACT</sup> ]<br>(0.946 - 6.285)                         | 1.993<br>(1.274 - 8.530)                                               | 0.7209        | 1.053<br>(0.419 - 2.081)                                               | 0.4062  | 0.5777        |
|          | T1 [2 <sup>-ΔACT</sup> ]<br>(0.777 - 6.101)                         | 2.289<br>(1.512 - 13.081)                                              | <b>0.0303</b> | 1.053<br>(0.419 - 2.081)                                               | 0.4749  | <b>0.0251</b> |
|          | Δ(T1-T0)/ T0 [%]<br>(-32.90 - 52.75)                                | 14.87<br>(-40.64 - 386.57)                                             | 0.2973        |                                                                        |         |               |
| miR-133a | T0 [2 <sup>-ΔACT</sup> ]<br>(0.364 - 2.110)                         | 0.772<br>(0.521 - 1.925)                                               | 0.3562        | 1.205<br>(0.418 - 2.536)                                               | 0.7094  | >0.9999       |
|          | T1 [2 <sup>-ΔACT</sup> ]<br>(0.3657 - 1.081)                        | 0.456<br>(0.5974 - 3.964)                                              | <b>0.0464</b> | 1.205<br>(0.418 - 2.536)                                               | 0.2882  | >0.9999       |
|          | Δ(T1-T0)/ T0 [%]<br>(-55.74 - 46.80)                                | -13.31<br>(-36.49 - 179.10)                                            | 0.2107        |                                                                        |         |               |

**Supplementary Table 4: Analysis of CMRI parameters in MR patients with upregulated or downregulated postoperative levels of pEXO.** CMRI and pEXO data were collected from MR patients (N=19) before (T0) and 6 months after MVR surgery (T1); isolated pEXO were quantified by NTA as described in the methods. Percentage of change in pEXO was calculated as  $\% \Delta = (T1-T0)/T0 * 100$ , and patients were grouped depending on exosome decrease (DOWN,  $\% \Delta < 0$ ) or increase (UP,  $\% \Delta > 0$ ) after surgery. Percentage variation of CMRI parameters between the presurgical scan (T0) and the postsurgical follow up (T1) was calculated as  $\% \Delta = (T1-T0)/T0 * 100$ . T0, T1 and percentage change CMRI data ( $\% \Delta$ ) were compared between patients with exosome downregulation (DOWN) and patients with exosome increase (UP) after surgery. Data are presented as mean  $\pm$  SD. Statistical significance of the differences was evaluated by independent samples Student's T test (with or without Welch's correction) or Mann Whitney test depending on data distribution.

|                     |                               | Decrease in exosome secretion (DOWN) | Increase in exosome secretion (UP)   |    | p-value       |
|---------------------|-------------------------------|--------------------------------------|--------------------------------------|----|---------------|
| LVEDVi              | T0 [mL/m <sup>2</sup> ]       | 116.7 $\pm$ 27.07                    | 111.9 $\pm$ 25.38                    | Ns | 0.6995        |
|                     | T1 [mL/m <sup>2</sup> ]       | 79.57 $\pm$ 6.60                     | 70.00 $\pm$ 14.46                    | Ns | 0.1195        |
|                     | $\Delta (T1-T0)/ T0$ [%]      | <b>-30.02 <math>\pm</math> 9.42</b>  | <b>-34.84 <math>\pm</math> 18.71</b> | Ns | <b>0.5367</b> |
| LVESVi              | T0 [mL/m <sup>2</sup> ]       | 46.43 $\pm$ 14.98                    | 40.21 $\pm$ 9.45                     | Ns | 0.2794        |
|                     | T1 [mL/m <sup>2</sup> ]       | 39.57 $\pm$ 8.32                     | 33.25 $\pm$ 9.78                     | Ns | 0.1707        |
|                     | $\Delta (T1-T0)/ T0$ [%]      | <b>-11.91 <math>\pm</math> 13.56</b> | <b>-14.92 <math>\pm</math> 27.41</b> | Ns | <b>0.5358</b> |
| RVEDVi              | T0 [mL/m <sup>2</sup> ]       | 85.91 $\pm$ 13.50                    | 84.12 $\pm$ 17.20                    | Ns | 0.8160        |
|                     | T1 [mL/m <sup>2</sup> ]       | 69.00 $\pm$ 7.85                     | 65.67 $\pm$ 12.50                    | Ns | 0.5356        |
|                     | $\Delta (T1-T0)/ T0$ [%]      | <b>-18.38 <math>\pm</math> 12.46</b> | <b>-20.70 <math>\pm</math> 13.69</b> | Ns | <b>0.7171</b> |
| RVESVi              | T0 [mL/m <sup>2</sup> ]       | 34.89 $\pm$ 7.935                    | 34.18 $\pm$ 9.90                     | Ns | 0.8751        |
|                     | T1 [mL/m <sup>2</sup> ]       | 28.43 $\pm$ 7.57                     | 31.25 $\pm$ 7.59                     | Ns | 0.4449        |
|                     | $\Delta (T1-T0)/ T0$ [%]      | <b>-16.34 <math>\pm</math> 20.68</b> | <b>-4.62 <math>\pm</math> 25.10</b>  | Ns | <b>0.3116</b> |
| LV Mass index       | T0 [g/m <sup>2</sup> ]        | 78.10 $\pm$ 14.00                    | 77.05 $\pm$ 13.59                    | Ns | 0.8742        |
|                     | T1 [g/m <sup>2</sup> ]        | 76.16 $\pm$ 10.20                    | 67.28 $\pm$ 8.69                     | Ns | 0.0598        |
|                     | $\Delta (T1-T0)/ T0$ [%]      | <b>-1.75 <math>\pm</math> 7.10</b>   | <b>-11.62 <math>\pm</math> 9.74</b>  | ▼  | <b>0.0323</b> |
| LVSVi               | T0 [mL/m <sup>2</sup> ]       | 70.29 $\pm$ 16.49                    | 73.73 $\pm$ 17.99                    | Ns | 0.6886        |
|                     | T1 [mL/m <sup>2</sup> ]       | 40.14 $\pm$ 8.82                     | 36.75 $\pm$ 6.96                     | Ns | 0.4030        |
|                     | $\Delta (T1-T0)/ T0$ [%]      | <b>-41.93 <math>\pm</math> 12.58</b> | <b>-44.90 <math>\pm</math> 16.08</b> | Ns | <b>0.6856</b> |
| RVSVi               | T0 [mL/m <sup>2</sup> ]       | 51.00 $\pm$ 8.00                     | 51.18 $\pm$ 11.16                    | Ns | 0.9707        |
|                     | T1 [mL/m <sup>2</sup> ]       | 40.57 $\pm$ 5.25                     | 34.50 $\pm$ 7.98                     | Ns | 0.0916        |
|                     | $\Delta (T1-T0)/ T0$ [%]      | <b>-19.93 <math>\pm</math> 9.91</b>  | <b>-27.90 <math>\pm</math> 16.55</b> | Ns | <b>0.2698</b> |
| LVEF                | T0 [%]                        | 60.57 $\pm$ 7.57                     | 63.75 $\pm$ 4.53                     | Ns | 0.2644        |
|                     | T1 [%]                        | 50.57 $\pm$ 10.29                    | 52.83 $\pm$ 6.13                     | Ns | 0.5530        |
|                     | $\Delta (T1-T0)/ T0$ [%]      | <b>-17.11 <math>\pm</math> 11.57</b> | <b>-16.99 <math>\pm</math> 8.69</b>  | Ns | <b>0.9806</b> |
| RVEF                | T0 [%]                        | 59.71 $\pm$ 5.85                     | 59.50 $\pm$ 7.28                     | Ns | 0.9480        |
|                     | T1 [%]                        | 58.86 $\pm$ 7.71                     | 52.42 $\pm$ 6.87                     | Ns | 0.0764        |
|                     | $\Delta (T1-T0)/ T0$ [%]      | <b>-1.03 <math>\pm</math> 8.88</b>   | <b>-11.13 <math>\pm</math> 13.21</b> | Ns | <b>0.0911</b> |
| Heart rate          | T0 [BPM]                      | 60.00 $\pm$ 6.63                     | 61.58 $\pm$ 8.82                     | Ns | 0.6867        |
|                     | T1 [BPM]                      | 66.86 $\pm$ 15.51                    | 72.58 $\pm$ 11.30                    | Ns | 0.3653        |
|                     | $\Delta (T1-T0)/ T0$ [%]      | <b>10.83 <math>\pm</math> 17.73</b>  | <b>20.54 <math>\pm</math> 26.75</b>  | Ns | <b>0.4062</b> |
| Cardiac index       | T0 [mL/min · m <sup>2</sup> ] | 4176 $\pm$ 791.3                     | 4183 $\pm$ 1300                      | Ns | 0.9907        |
|                     | T1 [mL/min · m <sup>2</sup> ] | 2581 $\pm$ 330.0                     | 2671 $\pm$ 665.0                     | Ns | 0.7435        |
|                     | $\Delta (T1-T0)/ T0$ [%]      | <b>-37.29 <math>\pm</math> 7.73</b>  | <b>-28.57 <math>\pm</math> 33.97</b> | Ns | <b>0.4097</b> |
| LA Area             | T0 [cm]                       | 19.29 $\pm$ 7.16                     | 19.42 $\pm$ 8.60                     | Ns | 0.8857        |
|                     | T1 [cm]                       | 9.714 $\pm$ 1.70                     | 10.08 $\pm$ 2.47                     | Ns | 0.9056        |
|                     | $\Delta (T1-T0)/ T0$ [%]      | <b>-45.04 <math>\pm</math> 18.51</b> | <b>-42.21 <math>\pm</math> 19.15</b> | Ns | <b>0.7565</b> |
| RA Area             | T0 [cm]                       | 16.29 $\pm$ 7.87                     | 13.17 $\pm$ 3.95                     | Ns | 0.6939        |
|                     | T1 [cm]                       | 11.14 $\pm$ 2.48                     | 10.25 $\pm$ 2.26                     | Ns | 0.4335        |
|                     | $\Delta (T1-T0)/ T0$ [%]      | <b>-23.22 <math>\pm</math> 20.78</b> | <b>-18.47 <math>\pm</math> 21.23</b> | Ns | <b>0.6413</b> |
| LA-max volume index | T0 [mL/m <sup>2</sup> ]       | 74.18 $\pm$ 13.39                    | 79.55 $\pm$ 33.42                    | Ns | 0.7156        |
|                     | T1 [mL/m <sup>2</sup> ]       | 40.22 $\pm$ 6.51                     | 36.34 $\pm$ 7.88                     | Ns | 0.2867        |
|                     | $\Delta (T1-T0)/ T0$ [%]      | <b>-43.03 <math>\pm</math> 8.86</b>  | <b>-46.48 <math>\pm</math> 19.34</b> | Ns | <b>0.6895</b> |
| LAEF                | T0 [%]                        | 48.83 $\pm$ 3.54                     | 56.20 $\pm$ 10.96                    | Ns | 0.0740        |
|                     | T1 [%]                        | 34.86 $\pm$ 10.29                    | 38.83 $\pm$ 11.30                    | Ns | 0.4559        |
|                     | $\Delta (T1-T0)/ T0$ [%]      | <b>-24.50 <math>\pm</math> 18.48</b> | <b>-29.48 <math>\pm</math> 24.59</b> | Ns | <b>0.6765</b> |

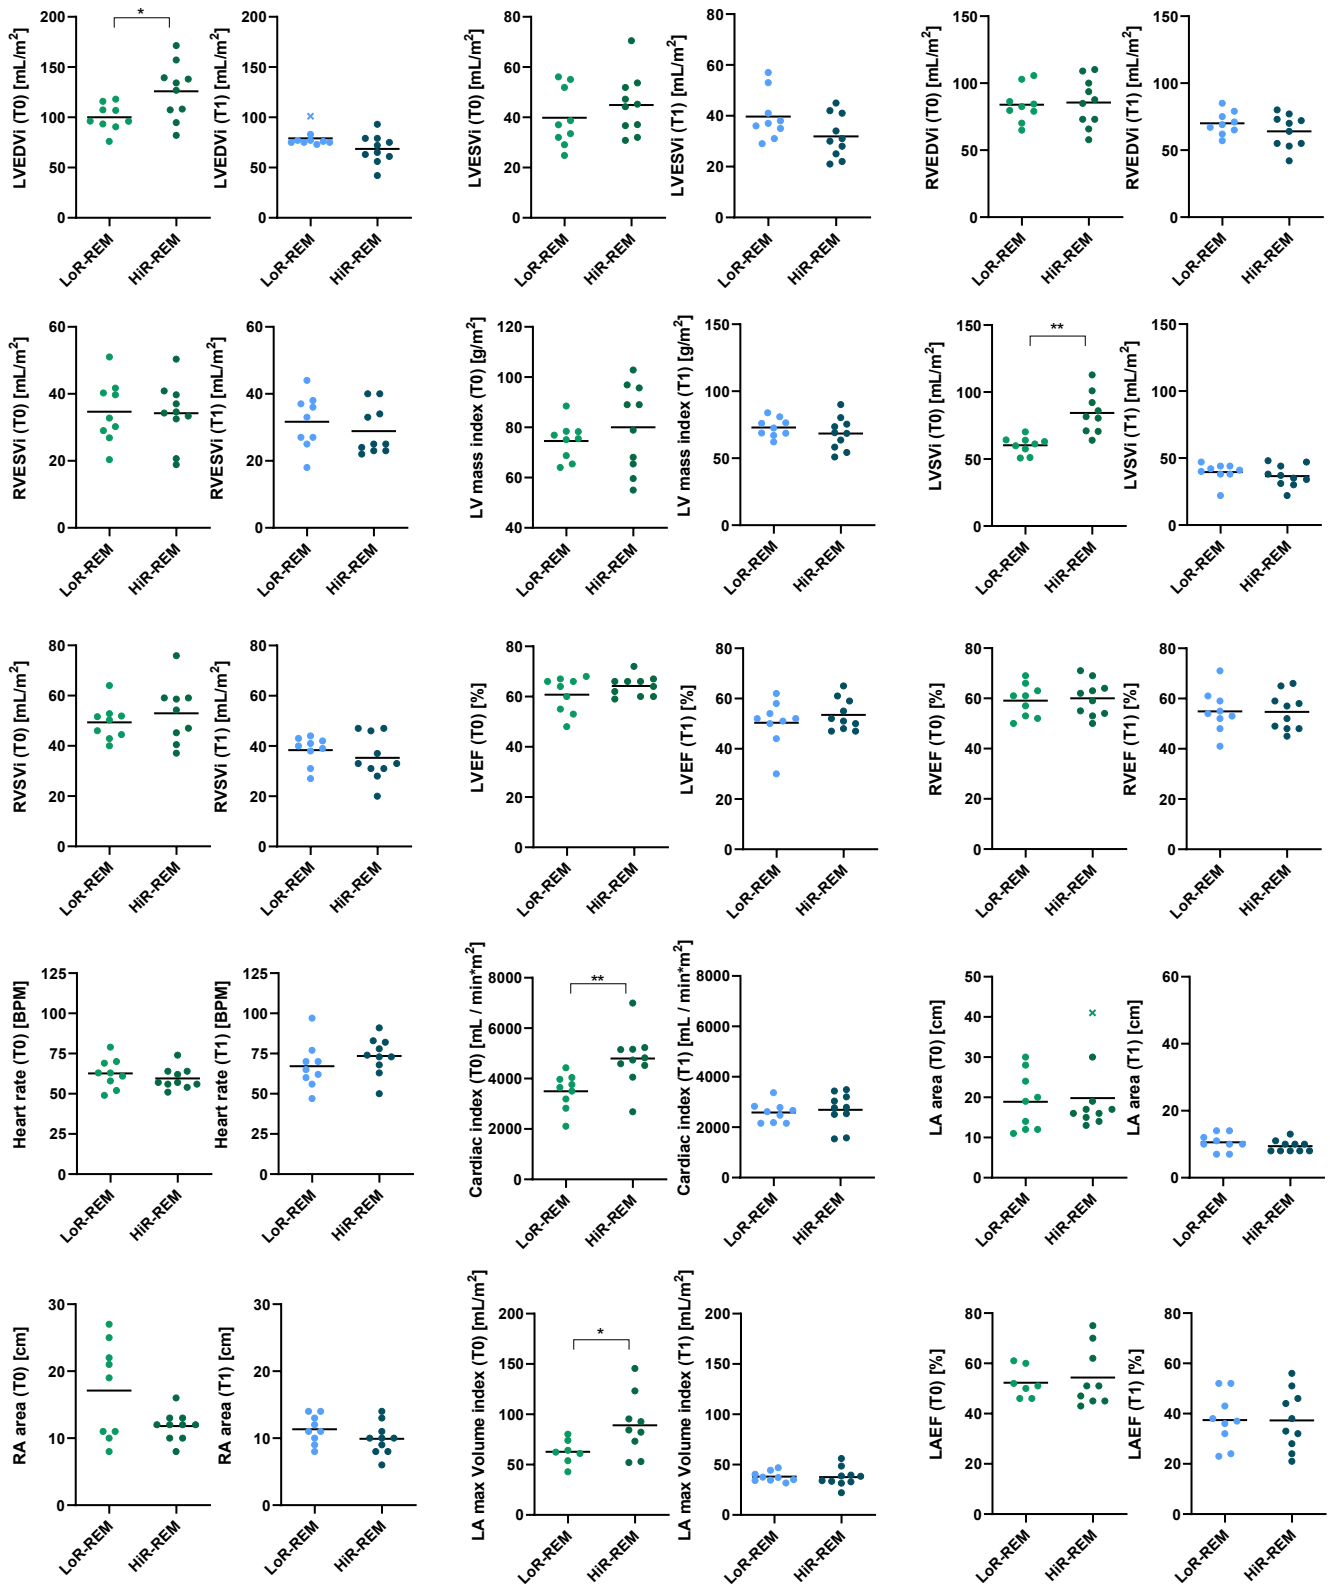

**Supplementary Figure 1: Analysis of preoperative (T0) and postoperative (T1) CMRI parameters in MR patients showing different rates of reverse remodeling after MVR surgery.** CMRI data were collected for N=19 patients undergoing MVR surgery before (T0) and 6 months after (T1) the procedure. Data were compared between LoR-REM and HiR-REM patients. Individual data are shown, horizontal bars represent group average. Statistical significance of the differences was evaluated by independent samples Student's T test (with or without Welch's correction) or Mann Whitney test depending on data distribution. \*, p<0.05; \*\*, p<0.01; \*\*\*, p<0.001; \*\*\*\*, p<0.0001.

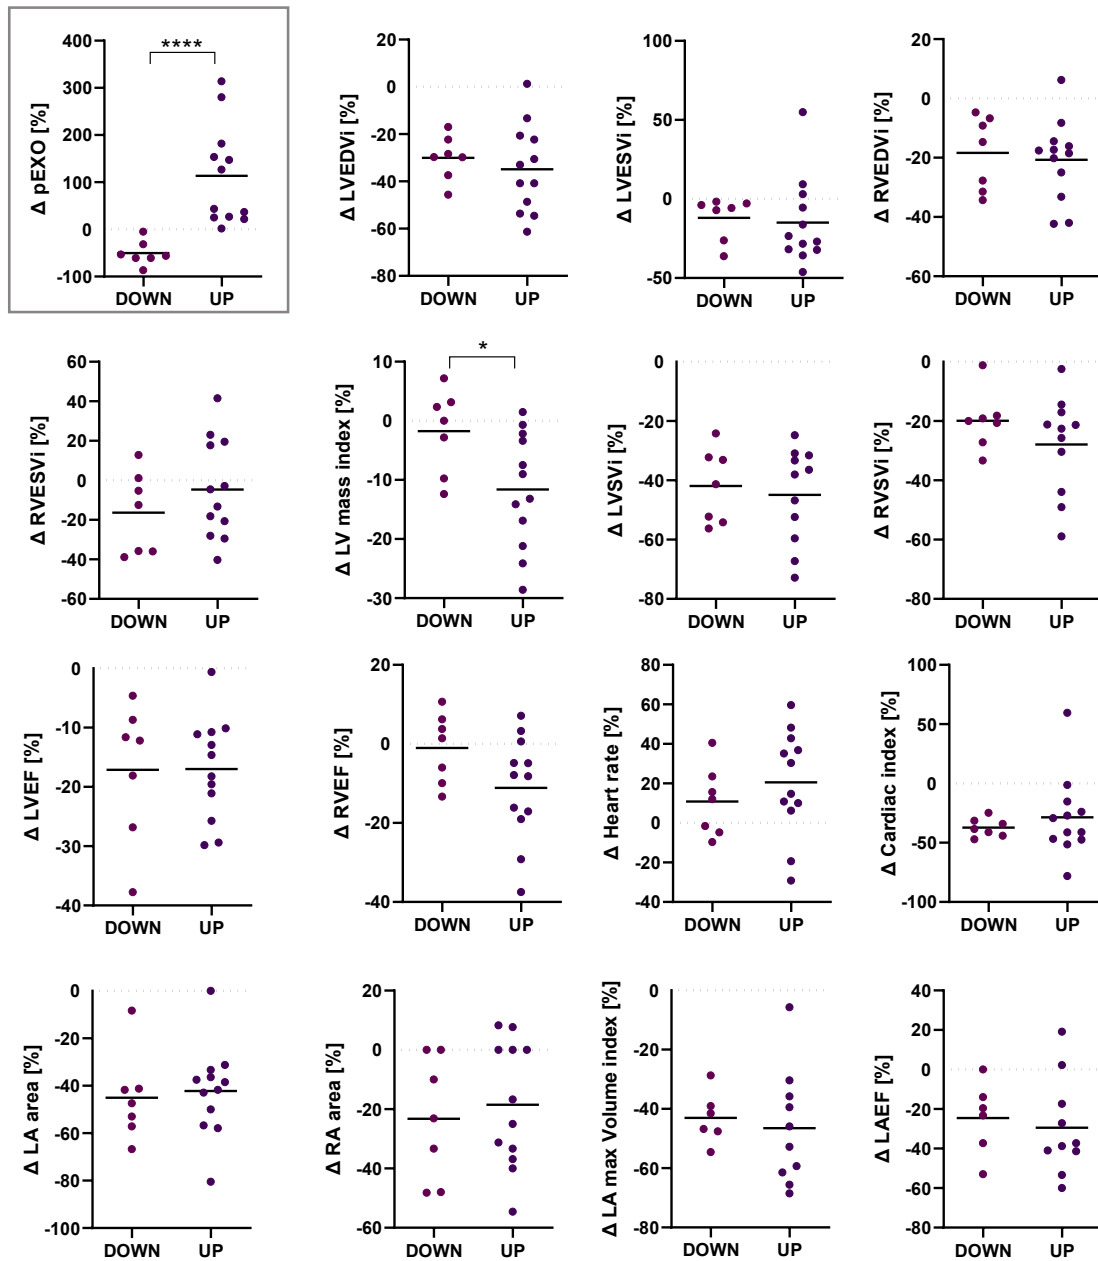

**Supplementary Figure 2: Analysis of CMRI parameters in MR patients with upregulated or downregulated postoperative levels of pEXO.** CMRI and pEXO data were collected from MR patients (N=19) before (T0) and 6 months after MVR surgery (T1); isolated pEXO were quantified by NTA as described in the methods. Percentage of change in pEXO was calculated as  $\% \Delta = (T1-T0)/T0 * 100$ , and patients were grouped depending on exosome decrease (DOWN,  $\% \Delta < 0$ ) or increase (UP,  $\% \Delta > 0$ ) after surgery. Percentage variation of CMRI parameters between the presurgical scan (T0) and the postsurgical follow up (T1) was calculated as  $\% \Delta = (T1-T0)/T0 * 100$ . Data are compared between patients with exosome downregulation (DOWN) and patients with exosome increase (UP) after surgery. Individual data are shown; horizontal bars represent group average. Statistical significance of the differences was evaluated by independent samples Student's T test (with or without Welch's correction) or Mann Whitney test depending on data distribution. \*,  $p < 0.05$ ; \*\*,  $p < 0.01$ ; \*\*\*,  $p < 0.001$ ; \*\*\*\*,  $p < 0.0001$ .

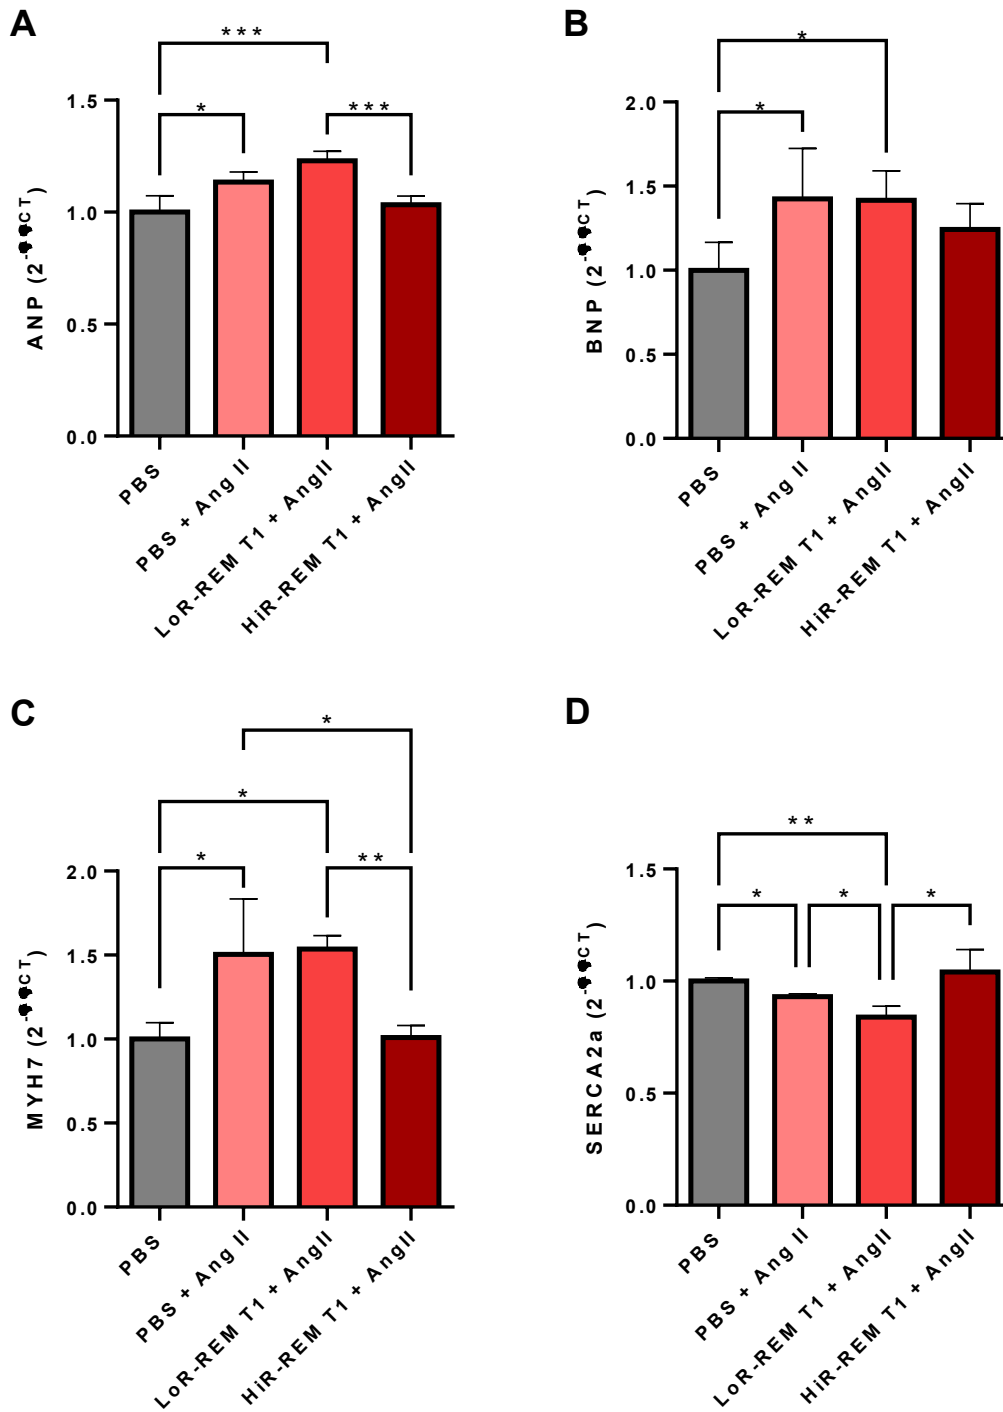

**Supplementary figure 3: Effect of pEXOs from patients with different grade of reverse ventricular remodeling on cardiomyocytes size.** HL-1 cells were seeded at a concentration of 5,000 cells / cm<sup>2</sup> and allowed to adhere for 24 h before treatment. Cells were treated with ± 1 μM Angiotensin II (AngII, Sigma) in complete Claycomb medium for 48 hours. A PBS suspension of pEXOs isolated from HiR- or LoR-REM group at T1 was added to a final concentration of 1 · 10<sup>9</sup> particles / mL, 24 h after the beginning of the treatment, and the treatment was maintained for the remaining 24 h; PBS was employed as a control. RNA was isolated using using PRImeZOL™ reagent and RT-PCR performed as described in the methods. Relative expression of specific markers is presented in the figure: A) ANP; B)BNP; C) β-MHC (MYH7) D) SERCA2a.
